# Supplementary material for: Antibacterial Activity and Action Mechanism of Bacteriocin Paracin wx7 as a Selective Biopreservative against Vancomycin-Resistant Enterococcus faecalis in Fresh-Cut Lettuce
Source: MDPI journal article supplement (doi:10.3390/foods13101448), 2024-05-08
Supplement: s1 [file s1]

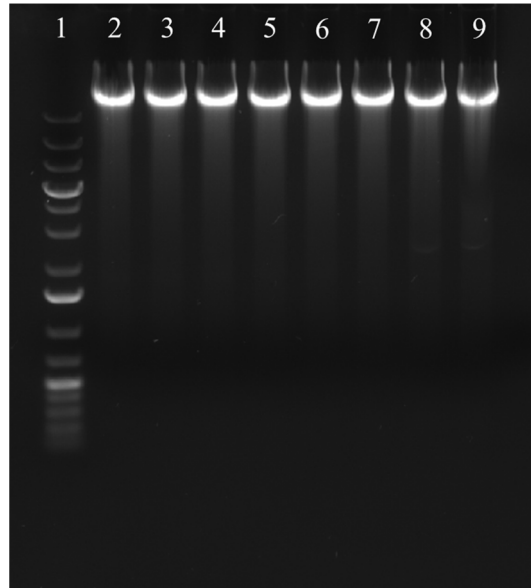

**Figure. S1** Effect of paracin wx7 on DNA of *E. faecalis*.

Lane 1 is DNA marker (geneRuler 1kb plus, ThermoFisher, USA), lane 2 is DNA of *E. faecalis* without bacteriocin treatment, lane 3 to 9 are DNA of *E. faecalis* treated by paracin wx7 (DNA : bacteriocin) at ratio of 3.125:200, 6.25:200; 12.5:200; 25:200, 50:200, 100:200, 200:200, respectively ( $\mu\text{g/mL}$  :  $\mu\text{g/mL}$ ).
